# Supplementary figures and images for: Realizing the Promise of Learning Organizations to Transform Mental Health Care: Telepsychiatry Care As an Exemplar
Source: Atypon-hosted journal article supplement (doi:10.1176/appi.ps.202000257), 2020-08-12

Figure 1. Alignment in the use of data to improve quality and outcomes

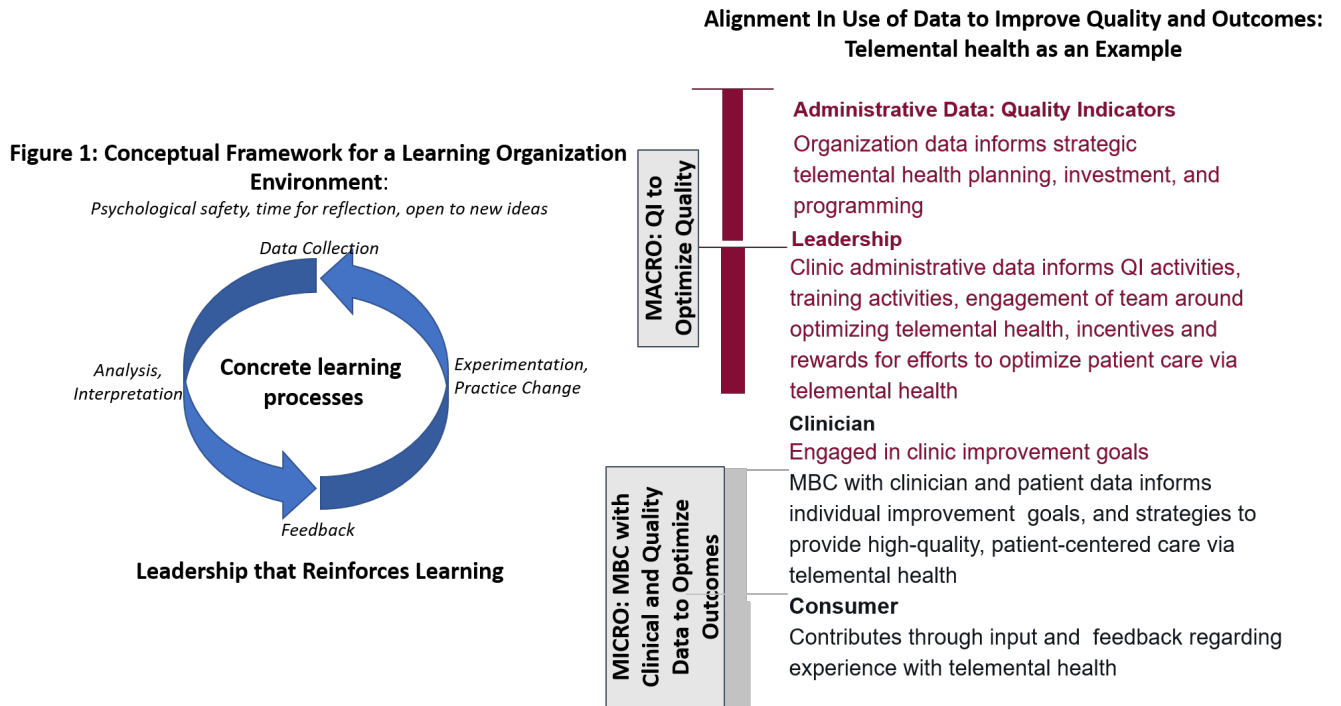

Supplement: appi.ps.202000257.ds001.pdf [file appi.ps.202000257.ds001.pdf]
